# Supplementary material for: Yin and yang of cannabinoid CB1 receptor: CB1 deletion in immune cells causes exacerbation while deletion in non-immune cells attenuates obesity
Source: PubMed Central journal article supplement — iScience. 2022 Aug 24;25(9):104994. doi: 10.1016/j.isci.2022.104994 (PMC9460165; doi:10.1016/j.isci.2022.104994), 2022-08-24
Supplement: mmc1.pdf [file mmc1.pdf]

**Supplemental information**

**Yin and yang of cannabinoid CB1 receptor: CB1  
deletion in immune cells causes exacerbation while  
deletion in non-immune cells attenuates obesity**

**Kathryn Miranda, William Becker, Philip B. Busbee, Nicholas Dopkins, Osama A. Abdulla, Yin Zhong, Jiajia Zhang, Mitzi Nagarkatti, and Prakash S. Nagarkatti**

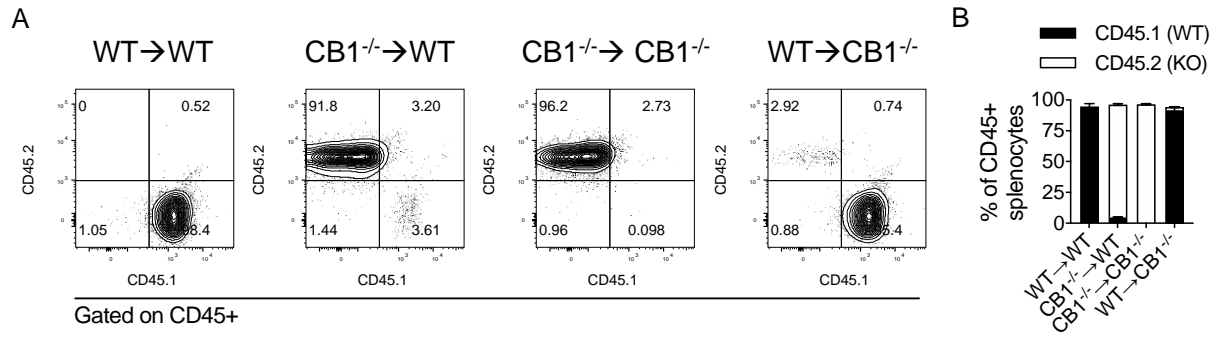

**Figure S1. Validation of bone marrow reconstitution in chimeric mice.** Chimeric mice were generated by bone marrow transplantation as described in Figure 4 legend. After 16 weeks of HFD, spleens were harvested and stained for CD45, CD45.1, and CD45.2 to confirm immune system reconstitution by donor cells. See also Figure 4.

- A) Representative flow cytometry contour plots of CD45<sup>+</sup> gated splenocytes.
- B) Percentages of CD45<sup>+</sup> splenocytes expressing CD45.1 (CB1 WT) and CD45.2 (CB1 KO).

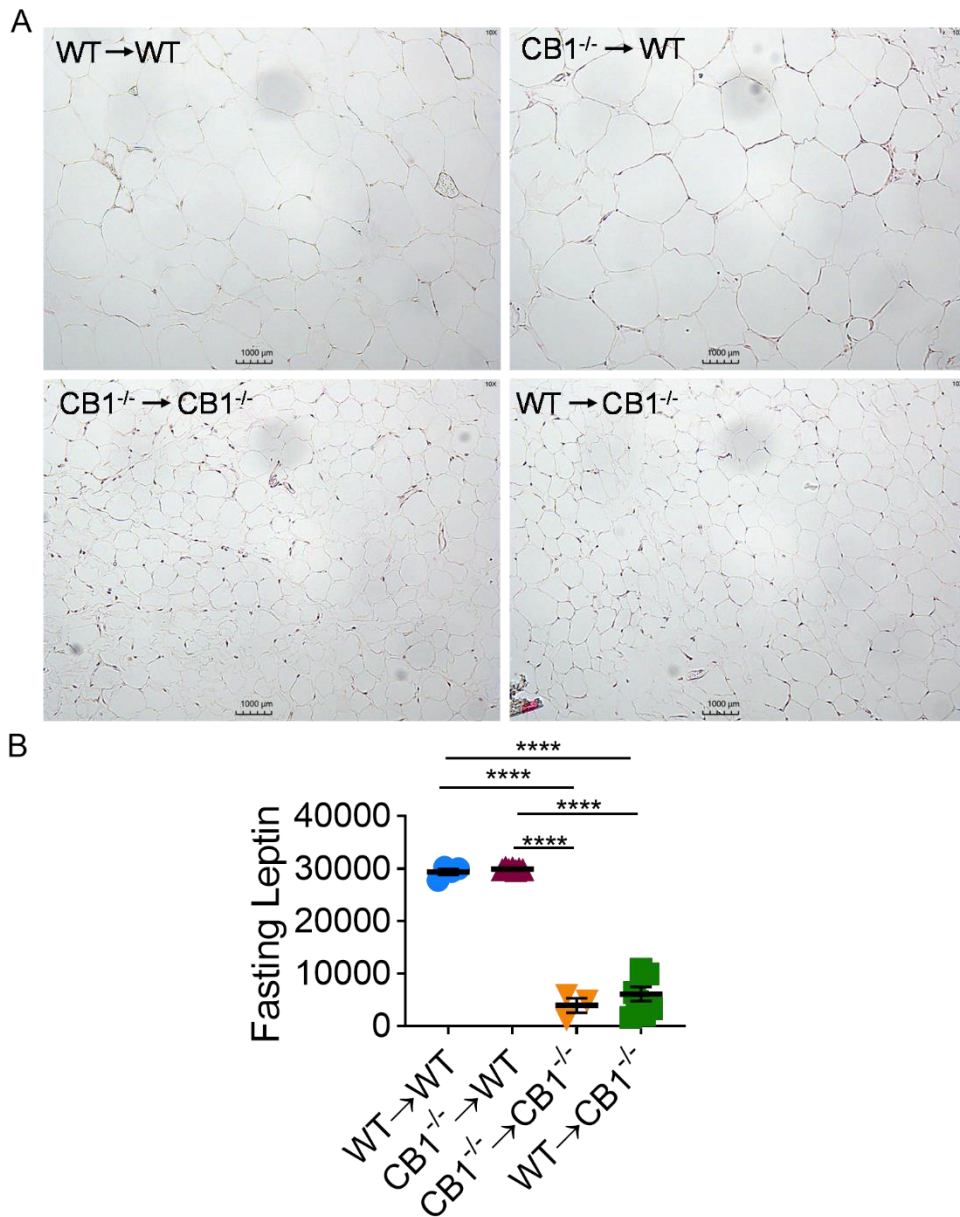

**Figure S2. Representative epididymal fat pad histology and serological HOMA-IR and leptin data from chimeric experiments.** Chimeric mice were generated by bone marrow transplantation as described in Figure 4 legend. After 16 weeks of HFD, epididymal fat pads and serum were isolated.

A) Representative histology of sectioned epididymal fat from chimeric experimental groups stained with H&E. Imaged using 10x objective lens with scale bar (1000 $\mu$ M).

B) Fasting Leptin concentrations (pg/ml) from serum evaluated using ELISA kit. Data are mean  $\pm$  SEM with individual points representing biological replicates. N=8 mice/chimeric group or 4 mice/syngeneic control group. \*\*\*\*p<0.0001. See also Figure 4.

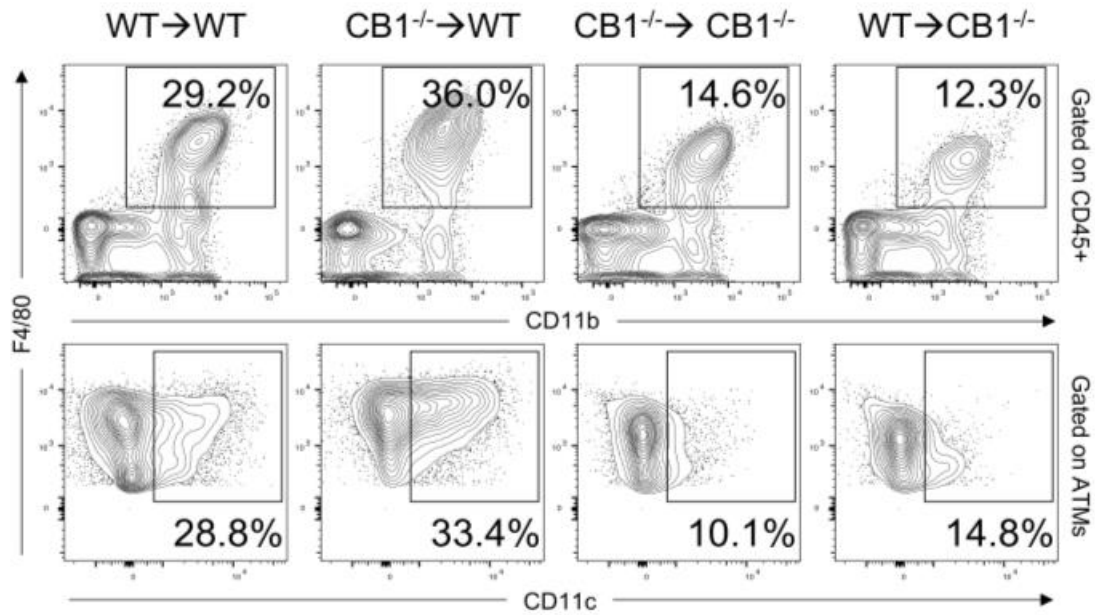

**Figure S3. Representative flow cytometry contour plots of epididymal ATMs from chimeric experiment.** Chimeric mice were generated by bone marrow transplantation as described in Figure 4 legend. After 16 weeks of HFD, cells were collected from epididymal fat and stained for CD11b+F4/80+ ATMs and ATM-gated CD11c+ M1 ATMs. See also Figure 4.
